# Supplementary material for: Self-assembly of dual-responsive amphiphilic POEGMA-b-P4VP-b-POEGMA triblock copolymers: effect of temperature, pH, and complexation with Cu2+
Source: Royal Society of Chemistry journal article supplement (doi:10.1039/d1py00716e), 2021-01-01
Supplement: d1py00716e1.pdf [file d1py00716e1.pdf]

## SUPPLEMENTARY INFORMATION

### Self-assembly of dual-responsive amphiphilic POEGMA-*b*-P4VP-*b*-POEGMA triblock copolymers: Effect of temperature, pH, and complexation with Cu<sup>2+</sup>

Daniela de Moraes Zanata and Maria Isabel Felisberti\*

Institute of Chemistry, University of Campinas (UNICAMP), P. O. Box 6154, Campinas, SP  
13083-970, Brazil

#### Table of Contents

| Section                                                                                                                                                     | Page |
|-------------------------------------------------------------------------------------------------------------------------------------------------------------|------|
| 1. Structural characterization of the copolymers                                                                                                            | 1    |
| 1.1 <sup>1</sup> H NMR spectrum                                                                                                                             | 1    |
| 1.2 GPC chromatograms                                                                                                                                       | 4    |
| 2. Differential Scanning Calorimetry                                                                                                                        | 5    |
| 3. Dynamic Light Scattering                                                                                                                                 | 6    |
| 3.1 The effect of pH                                                                                                                                        | 6    |
| 3.2 The effect of temperature                                                                                                                               | 8    |
| 4. Encapsulation of Nile red into POEG <sub>9</sub> MA <sub>26</sub> - <i>b</i> -P4VP <sub>56</sub> - <i>b</i> -POEG <sub>9</sub> MA <sub>26</sub> micelles | 9    |
| 5. Complexation of POEG <sub>5</sub> MA <sub>24</sub> - <i>b</i> -P4VP <sub>36</sub> - <i>b</i> -POEG <sub>5</sub> MA <sub>24</sub> with copper             | 10   |
| 6. References                                                                                                                                               | 12   |

\* Corresponding author: [misabel@unicamp.br](mailto:misabel@unicamp.br)

# 1. Structural characterization of $\text{POEG}_x\text{MA}_y\text{-}b\text{-P4VP}_z\text{-}b\text{-POEG}_x\text{MA}_y$ copolymers

## 1.1 $^1\text{H}$ NMR spectrum

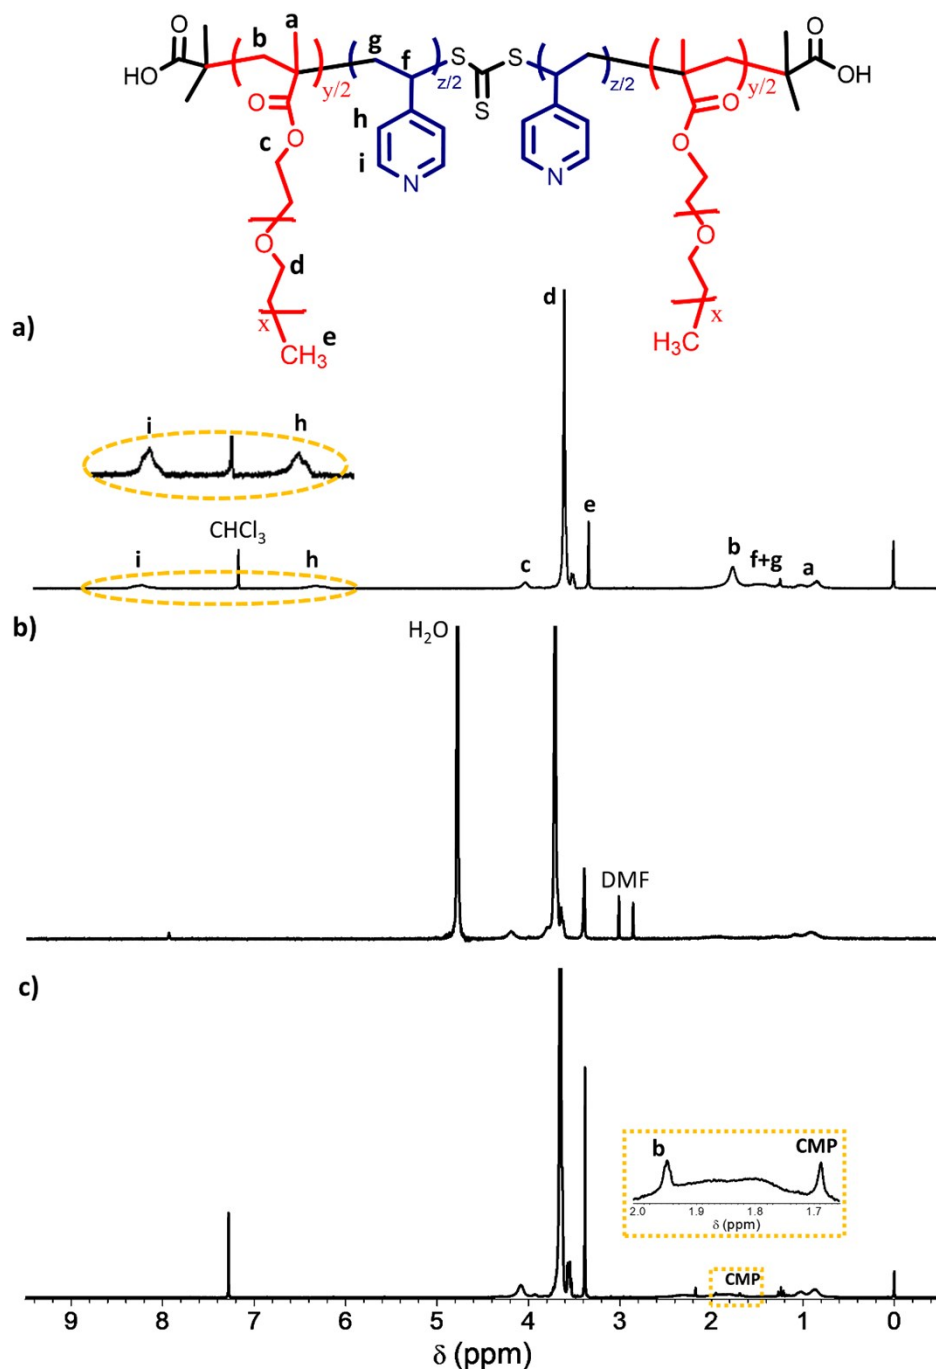

**Figure S1.**  $^1\text{H}$  NMR spectra of the  $\text{POEG}_9\text{MA}_{26}\text{-}b\text{-P4VP}_{56}\text{-}b\text{-POEG}_9\text{MA}_{26}$  copolymer obtained in **a)**  $\text{CDCl}_3$  and **b)**  $\text{D}_2\text{O}$  as well as the chemical structure of the copolymer with labeled hydrogens. **c)**  $^1\text{H}$  NMR spectrum of the  $\text{POEG}_9\text{MA}_{52}$  obtained in  $\text{CDCl}_3$ . The signals at 7.25 and 4.79 ppm are due to  $\text{CHCl}_3$  and  $\text{H}_2\text{O}$  residues in the deuterated solvents, respectively.

The degree of polymerization of macro-RAFT POEG<sub>x</sub>MA<sub>y</sub> (**y**) was calculated using Equation S1 and the <sup>1</sup>H NMR spectrum of the purified POEGMA.

$$\mathbf{y} = \frac{\frac{H_c}{2}}{\frac{H_{CMP}}{12}} \quad (\text{Equation S1})$$

where H<sub>c</sub> and H<sub>CMP</sub> are the areas of the signals assigned to the hydrogens H<sub>c</sub> of the POEGMA (δ = 4.0 ppm) and of the methyl hydrogens of CMP end chains (δ = 1.69 ppm), respectively.

The number average molar mass (M<sub>n</sub><sup>RMN</sup>) of the POEGMA block was calculated as the product of **y** and the molar mass of the OEGMA monomers.

The molar (*x*) and the mass fraction (ω) of POEGMA and P4VP were calculated by using Equations S2a-b and S3a-b, respectively.

$$x_{POEGMA} = \frac{\frac{H_c}{2}}{\left(\frac{H_c}{2}\right) + \left(\frac{H_h}{2}\right)} \quad (\text{Equation S2a})$$

$$x_{4VP} = \frac{\left(\frac{H_h}{2}\right)}{\left(\frac{H_c}{2}\right) + \left(\frac{H_h}{2}\right)} \quad (\text{Equation S2b})$$

$$\omega_{POEGMA} = \frac{\left(\frac{H_c}{2} \times MM_{OEGMA}\right)}{\left(\frac{H_c}{2} \times MM_{OEGMA}\right) + \left(\frac{H_h}{2} \times MM_{4VP}\right)}$$

(Equation S3a)

$$\omega_{4VP} = \frac{\left(\frac{H_h}{2} \times MM_{4VP}\right)}{\left(\frac{H_c}{2} \times MM_{OEGMA}\right) + \left(\frac{H_h}{2} \times MM_{4VP}\right)}$$

(Equation S3b)

where  $H_c$  and  $H_h$  are the areas of the signals assigned to the hydrogens  $H_c$  of the POEGMA block ( $\delta = 4.0$  ppm) and the signals assigned to the aromatic hydrogens  $H_h$  of the P4VP block ( $\delta = 6.2\text{--}6.6$  ppm), respectively.  $MM_{OEGMA}$  and  $MM_{4VP}$  are the molar masses of the OEGMA and 4VP monomers, respectively.

The degree of polymerization of the P4VP block ( $z$ ) was calculated using Equation S4 and the  $^1\text{H}$  NMR data of the purified  $\text{POEG}_x\text{MA}_y\text{-}b\text{-P4VP}_z\text{-}b\text{-POEG}_x\text{MA}_y$  copolymers.

$$z = \frac{x_{4VP} \times y}{x_{POEGMA}}$$

(Equation S4)

The number average molar mass ( $M_n^{\text{RMN}}$ ) of the P4VP block was calculated as the product of  $z$  and the molar mass of the 4VP monomers.

## 1.2 GPC chromatograms

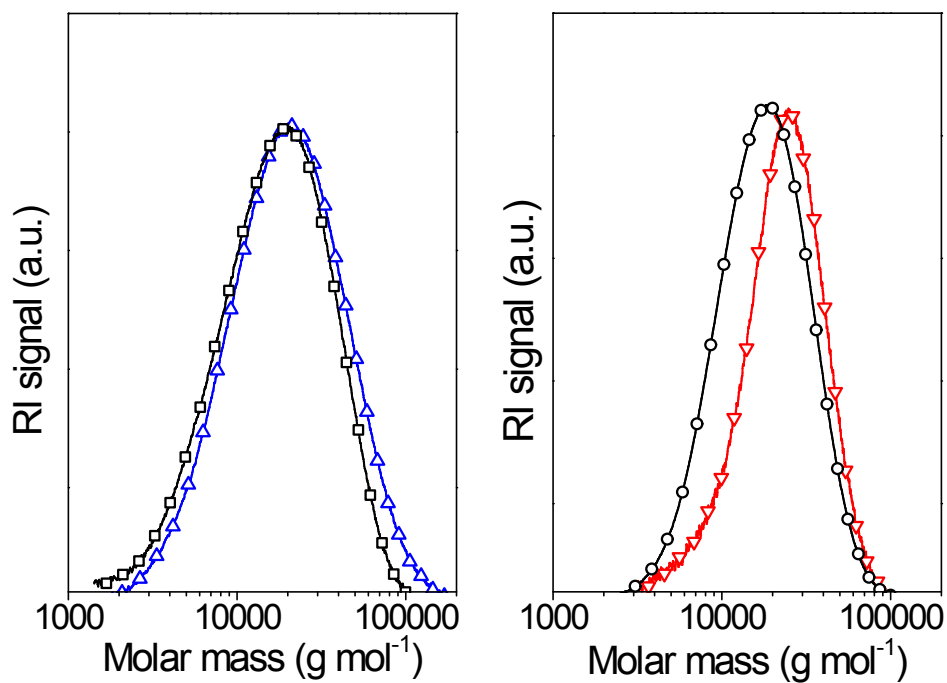

**Figure S2.** GPC chromatograms of the macro-RAFT agents and their respective copolymers: **a)** (□) POEG<sub>5</sub>MA<sub>48</sub> and (▣) POEG<sub>5</sub>MA<sub>24</sub>-*b*-P4VP<sub>36</sub>-*b*-POEG<sub>5</sub>MA<sub>24</sub> and **b)** (○)POEG<sub>9</sub>MA<sub>52</sub> and (◄) POEG<sub>9</sub>MA<sub>26</sub>-*b*-P4VP<sub>56</sub>-*b*-POEG<sub>9</sub>MA<sub>26</sub>. The chromatograms were normalized by the intensity of the peaks.

## 2. Differential Scanning Calorimetry

Differential scanning calorimetry (DSC) analyses were performed on a TA Instrument MDSC 2910 operating according to the following program: heating from 25 to 120 °C at 10 °C min<sup>-1</sup>, isotherm at 120 °C for 2 min, cooling from 120 °C to -90 °C at 10 °C min<sup>-1</sup>, isotherm at -90 °C for 10 min, and heating from -90 °C to 120 °C at 10 °C min<sup>-1</sup>. DSC scans were normalized to the sample mass.

Figure S3 shows the DSC curve for the POEG<sub>5</sub>MA<sub>24</sub>-*b*-P4VP<sub>36</sub>-*b*-POEG<sub>5</sub>MA<sub>24</sub> copolymer. It is noteworthy that the glass transition occurs around -50 °C, which is close to the T<sub>g</sub> for the POEGMA macro-RAFT agent. A second glass transition around 155 °C is attributed to the P4VP block<sup>1</sup>. The low  $\Delta C_p$  associated with this glass transition is due to the lower mass fraction of the P4VP block (22 wt %). The presence of two glass transitions and no first-order transition shows that the copolymer is amorphous and presents microphase separation<sup>2</sup>.

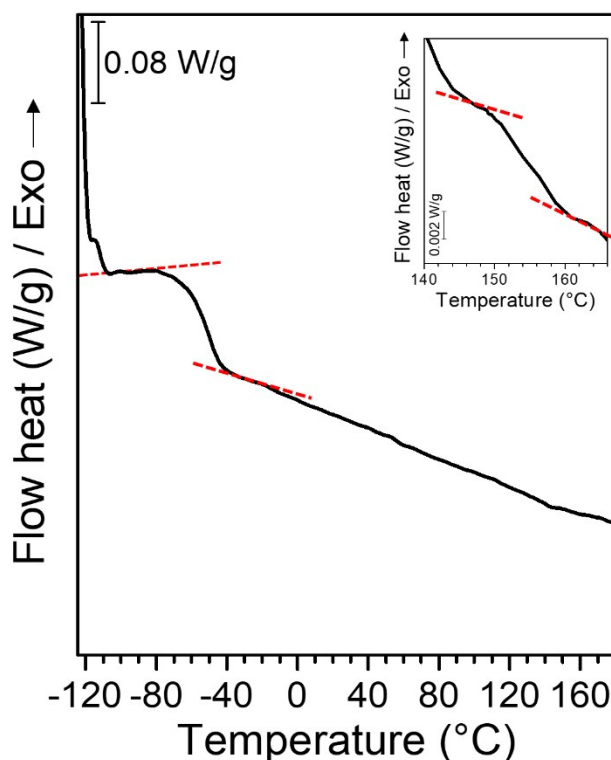

**Figure S3.** DSC curve of POEG<sub>5</sub>MA<sub>24</sub>-*b*-P4VP<sub>36</sub>-*b*-POEG<sub>5</sub>MA<sub>24</sub>.

### 3. Dynamic Light Scattering

#### 3.1 The effect of pH

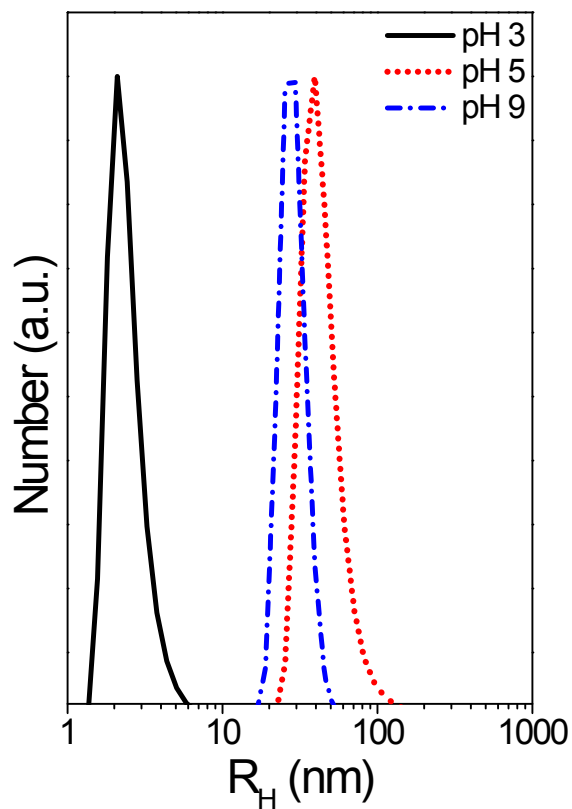

**Figure S4.** Hydrodynamic radius distribution by number, obtained by DLS, at 25 °C for the POEG<sub>5</sub>MA<sub>24</sub>-*b*-P4VP<sub>36</sub>-*b*-POEG<sub>5</sub>MA<sub>24</sub> aqueous solutions, prepared by the water addition method, at (—) pH 3, (•••) pH 5, and (—•—) pH 9, at 1 mg mL<sup>-1</sup>.

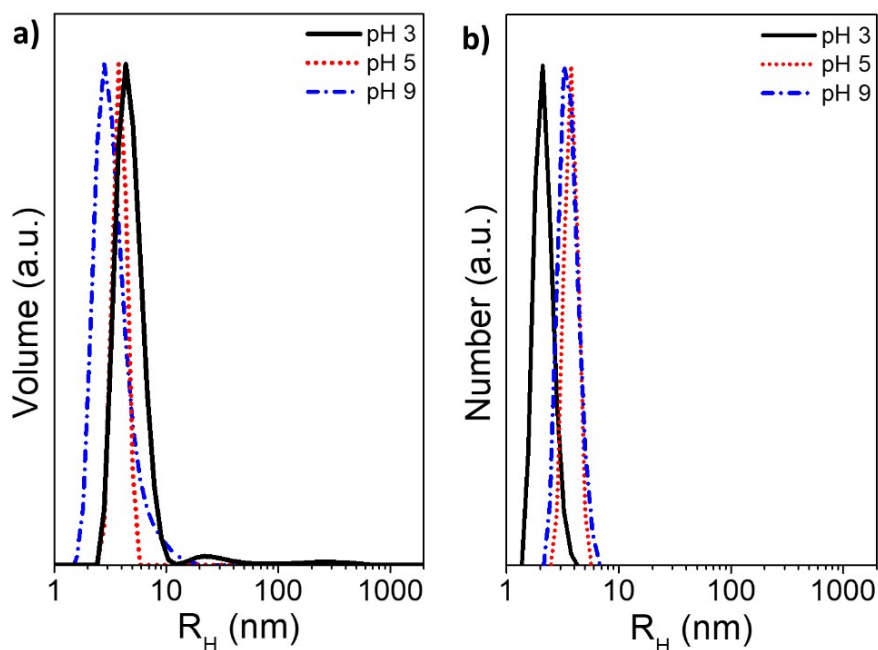

**Figure S5.** Hydrodynamic radius distribution by **a)** volume and **b)** number, obtained by DLS, at 25 °C for the POEG<sub>5</sub>MA<sub>24</sub>-*b*-P4VP<sub>36</sub>-*b*-POEG<sub>5</sub>MA<sub>24</sub> aqueous solutions, prepared by water addition method, at (—) pH 3, (•••) pH 5, and (—•—) pH 9 at 0.5 mg mL<sup>-1</sup>.

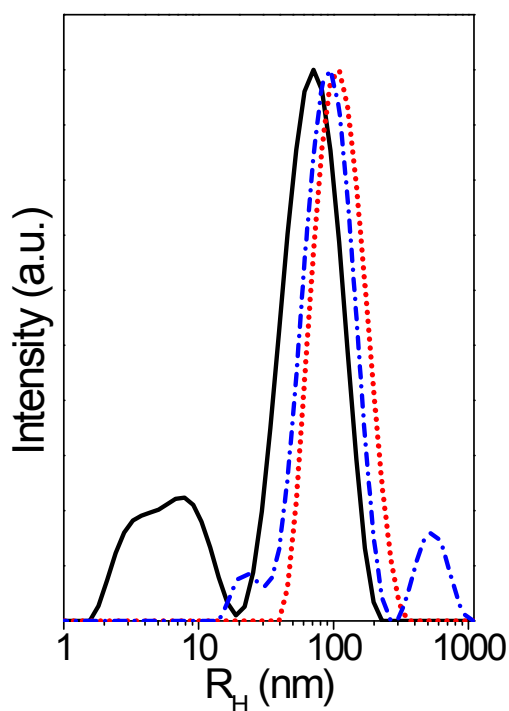

**Figure S6.** Hydrodynamic radius distribution by intensity, obtained by DLS, at 25 °C for the POEG<sub>9</sub>MA<sub>26</sub>-*b*-P4VP<sub>56</sub>-*b*-POEG<sub>9</sub>MA<sub>26</sub> aqueous solutions, prepared by the water addition method, at (—) pH 3, (•••) pH 5, and (—•—) pH 9 at 1.0 mg mL<sup>-1</sup>.



### 3.2 The effect of temperature

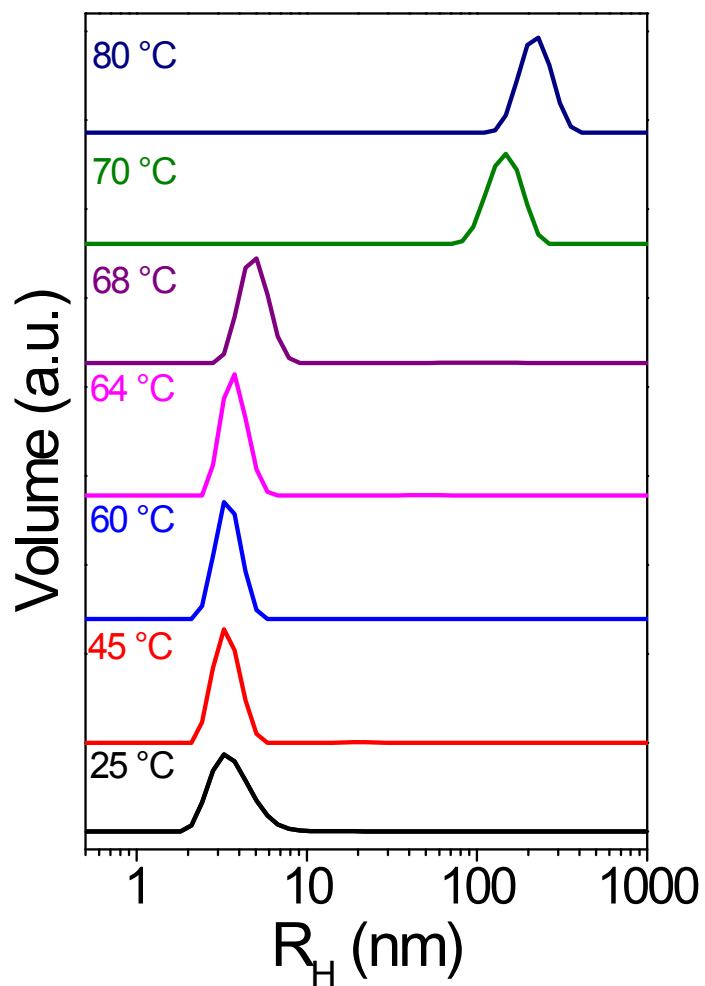

**Figure S7.** Hydrodynamic radius distribution by volume, obtained by DLS, at different temperatures for the  $\text{POEG}_5\text{MA}_{24}\text{-}b\text{-P4VP}_{36}\text{-}b\text{-POEG}_5\text{MA}_{24}$  aqueous solutions, in the heating step, at pH 3 and  $0.25 \text{ mg mL}^{-1}$ .

#### 4. Encapsulation of Nile red into POEG<sub>9</sub>MA<sub>26</sub>-*b*-P4VP<sub>56</sub>-*b*-POEG<sub>9</sub>MA<sub>26</sub> micelles

(a)

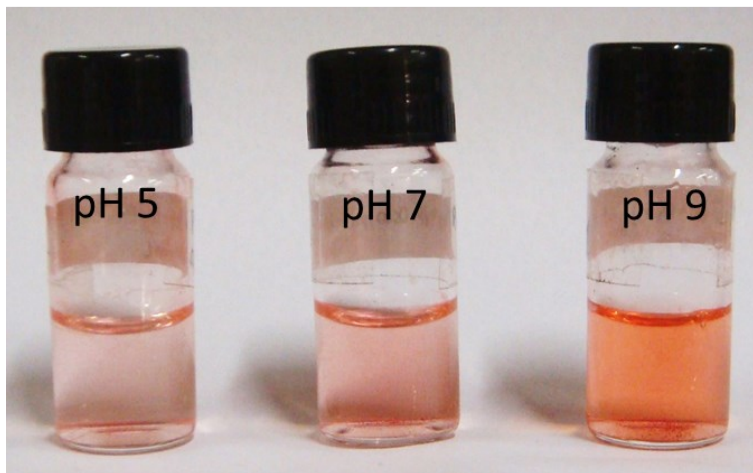

(b)

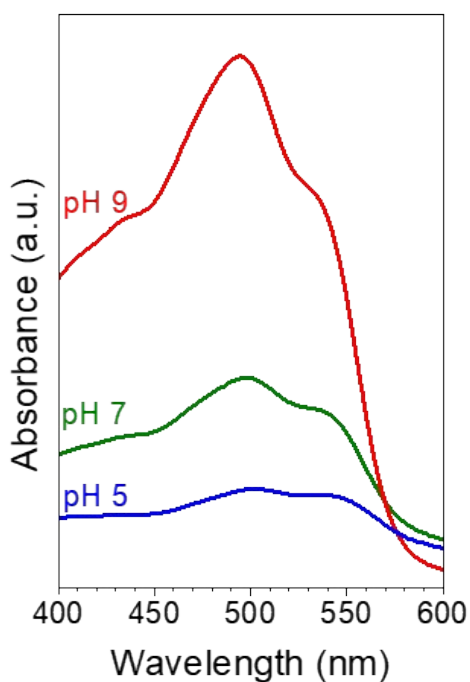

**Figure S8.** a) Images of the POEG<sub>9</sub>MA<sub>26</sub>-*b*-P4VP<sub>56</sub>-*b*-POEG<sub>9</sub>MA<sub>26</sub> copolymer aqueous solutions with encapsulated Nile red at pH 5, pH 7, and pH 9. b) UV/Vis spectrum of Nile Red encapsulated micelles of POEG<sub>9</sub>MA<sub>26</sub>-*b*-P4VP<sub>56</sub>-*b*-POEG<sub>9</sub>MA<sub>26</sub> aqueous solutions at 0.5 mg mL<sup>-1</sup>.

## 5. Complexation of POEG<sub>5</sub>MA<sub>24</sub>-*b*-P4VP<sub>36</sub>-*b*-POEG<sub>5</sub>MA<sub>24</sub> with copper

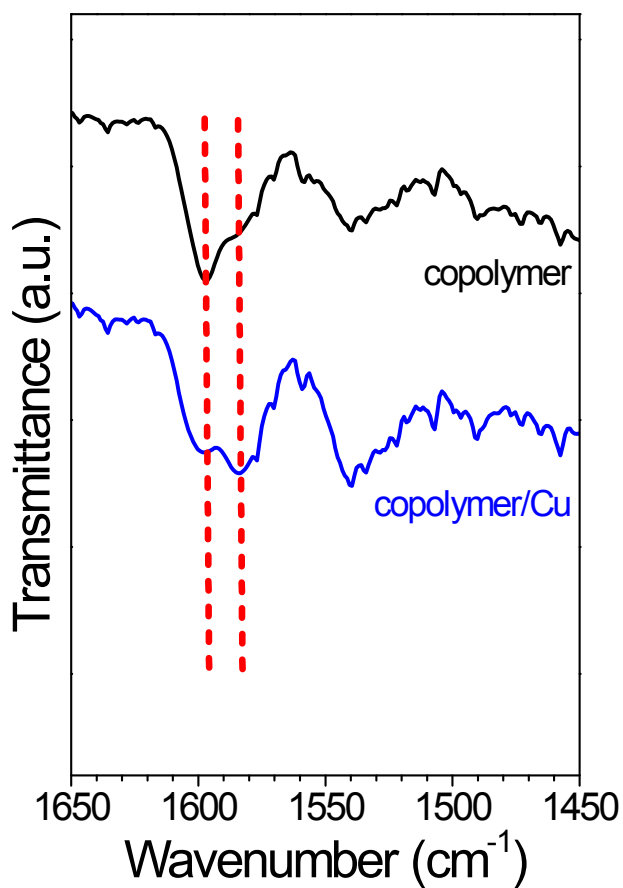

**Figure S9.** FTIR spectra of the region of the C-N vibrational stretching of the (—) POEG<sub>5</sub>MA<sub>24</sub>-*b*-P4VP<sub>36</sub>-*b*-POEG<sub>5</sub>MA<sub>24</sub> copolymer and (—) POEG<sub>5</sub>MA<sub>24</sub>-*b*-P4VP<sub>36</sub>-*b*-POEG<sub>5</sub>MA<sub>24</sub>/Cu<sup>2+</sup>.

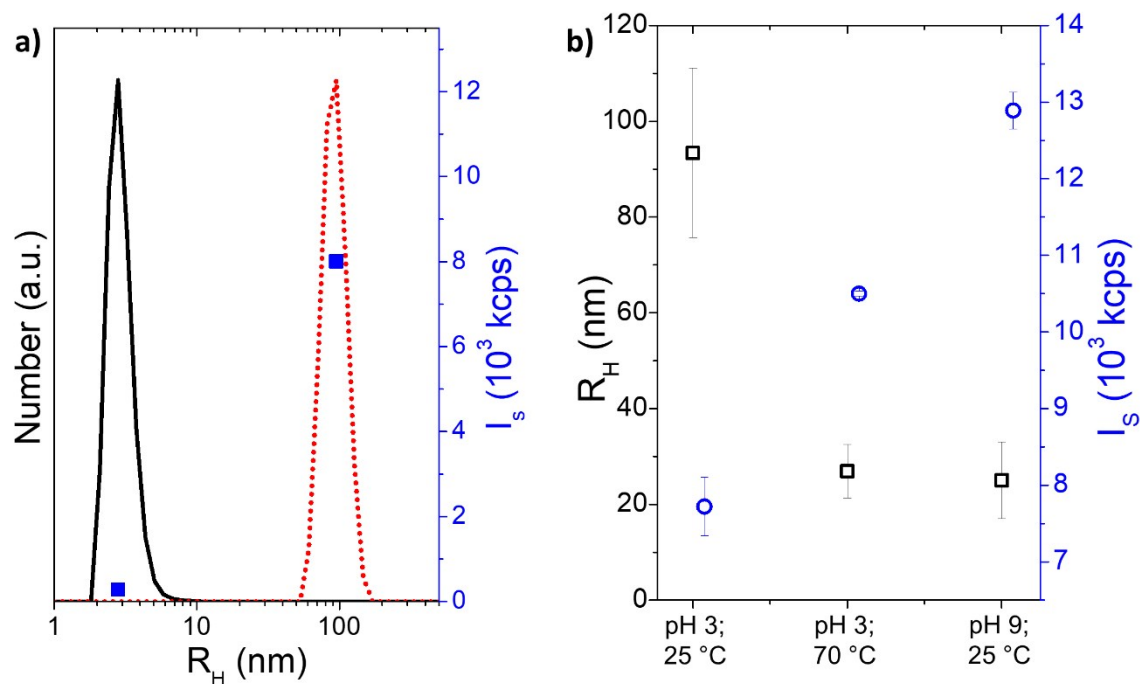

**Figure S10. a)** Hydrodynamic radius ( $R_H$ ) distribution by number and (○) derived count rate ( $I_s$ ), obtained by DLS, at pH 3 and 25 °C for the (—) POEG<sub>5</sub>MA<sub>24</sub>-*b*-P4VP<sub>36</sub>-*b*-POEG<sub>5</sub>MA<sub>24</sub> copolymer and (•••) POEG<sub>5</sub>MA<sub>24</sub>-*b*-P4VP<sub>36</sub>-*b*-POEG<sub>5</sub>MA<sub>24</sub>/Cu<sup>2+</sup> at 0.5 mg mL<sup>-1</sup>. The derived count rate is the ratio of the count rate and the attenuation factor. **b)** (□)  $R_H$  and (○)  $I_s$  for the POEG<sub>5</sub>MA<sub>24</sub>-*b*-P4VP<sub>36</sub>-*b*-POEG<sub>5</sub>MA<sub>24</sub>/Cu<sup>2+</sup> at pH 3 / 25 °C, pH 3 / 70 °C, and pH 9 / 25 °C.

## 6. References

- 1 J. Lee, J. Kwak, C. Choi, S. H. Han and J. K. Kim, *Macromolecules*, 2017, **50**, 9373–9379.
- 2 C. Huang, S. Kuo, J. Chen and F. Chang, *J. Polym. Res.*, 2005, **12**, 449–456.
